# Supplementary material
Source: publisher figshare collection journal article supplement (https://frontiersin.figshare.com/ndownloader/files/14861204)
Supplement: Supplementary file 1 [file 14861204]

## Sheet: Feuil1
							DATA
							Input of plastics into the envionment							Into waterways
							Administrative region or department	Population	Domestic waste	Plastic rate (ORDIF)	Leakages to the environment (Jambeck et al. 2015)	Total domestic waste generation (tonnes/an)	Mismanaged Plastic Waste MPW (t/yr)	0.15	0.4
							île de France/Paris Megacity	12082144	288
							Eure	582353	257
							Seine Maritime	685790	272
							Oise	771900	251
							Orne	31306	227
							Calvados	17367	270
							Loiret	191419	222
							Ardennes	62702	163
							Aisne	416924	234
							Meuse	75215	228
							Marne	568750	239
							Nièvre	30425	199
							Haute Marne	150858	254
							Cote d'Or	68879	222
							Aube	309056	251
							Yonne	340903	222
							Eure et Loire	314500	242
							Outside Paris Megacitiy	4618347	245.569
							Total Seine Watershed	16700491	276.266	0.16	0.02	738205	14764.1	2214.62	5905.64
							SOURCE
							sinoe.org
							GIS-Qgis-Data from Geofla2016
